# Supplementary material for: Causal associations between micronutrients and malignant neoplasms: a two-sample mendelian Randomization study
Source: Research Square preprint supplement (doi:10.21203/rs.3.rs-6966622/v1), 2025-08-20
Supplement: Supplementary file 2 [file 9a1a4e6695c54480cb23e0d8.docx]

**表 1. GWAS data of 15 micronutrients**

| Trait | GWAS ID | Sample size | Number of SNPs |
| --- | --- | --- | --- |
| Copper | ieu-a-1073 | 2,603 | 2,543,646 |
| Calcium | ukb-b-8951 | 64,979 | 9,851,867 |
| Carotene | ukb-b-16202 | 64,979 | 9,851,867 |
| Folate | ukb-b-11349 | 64,979 | 9,851,867 |
| Iron | ukb-b-20447 | 64,979 | 9,851,867 |
| Magnesium | ukb-b-7372 | 64,979 | 9,851,867 |
| Potassium | ukb-b-17881 | 64,979 | 9,851,867 |
| Selenium | ieu-a-1077 | 2,603 | 2,543,617 |
| Vitamin A | ukb-b-9596 | 460,351 | 9,851,867 |
| Vitamin B12 | ukb-b-19524 | 64,979 | 9,851,867 |
| Vitamin B6 | ukb-b-7864 | 64,979 | 9,851,867 |
| Vitamin C | ukb-b-19390 | 64,979 | 9,851,867 |
| Vitamin D | ukb-b-18593 | 64,979 | 9,851,867 |
| Vitamin E | ukb-b-6888 | 64,979 | 9,851,867 |
| Zinc | ieu-a-1079 | 2,603 | 2,543,610 |
