# Supplementary material for: Causal associations between micronutrients and malignant neoplasms: a two-sample mendelian Randomization study
Source: Research Square preprint supplement (doi:10.21203/rs.3.rs-6966622/v1), 2025-08-20
Supplement: Supplementary file 3 [file aa40249cfe8c359778851c76.docx]

**Supplement Table 2 with SNPS related to micronutrients**

| **SNPS** | **CHR** | **POS** | **EA** | **OA** | **BETA** | **SE** | **P** | **F** |
| --- | --- | --- | --- | --- | --- | --- | --- | --- |
| **Calcium** |  |  |  |  |  |  |  |  |
| rs12618785 | 2 | 147053856 | G | C | 0.0272715 | 0.00561451 | 1.20E-06 | 23.59 |
| rs4988235 | 2 | 136608646 | A | G | 0.032361 | 0.00601303 | 7.40E-08 | 28.96 |
| rs73238581 | 4 | 39412384 | A | C | -0.0271448 | 0.00570468 | 2.00E-06 | 22.64 |
| rs4535437 | 5 | 79242663 | G | A | 0.0316699 | 0.00627359 | 4.50E-07 | 25.48 |
| rs62347998 | 5 | 17168802 | T | C | 0.0641566 | 0.0138097 | 3.40E-06 | 21.58 |
| rs39308 | 7 | 116951671 | A | G | 0.0297088 | 0.00617194 | 1.50E-06 | 23.17 |
| rs2443773 | 8 | 109072593 | G | T | 0.0272002 | 0.00541645 | 5.10E-07 | 25.22 |
| rs1714800 | 8 | 3993856 | C | G | 0.0279524 | 0.00572153 | 1.00E-06 | 23.87 |
| rs7464794 | 8 | 17540356 | C | T | -0.0264599 | 0.0053917 | 9.20E-07 | 24.08 |
| rs117456360 | 9 | 22322947 | A | G | 0.0626521 | 0.0136422 | 4.40E-06 | 21.09 |
| rs1219820 | 10 | 125445215 | T | C | -0.076443 | 0.015952 | 1.70E-06 | 22.96 |
| rs11030416 | 11 | 28743834 | A | G | -0.0654539 | 0.0136013 | 1.50E-06 | 23.16 |
| rs7972943 | 12 | 98645517 | A | T | -0.0676063 | 0.0139755 | 1.30E-06 | 23.40 |
| rs753899 | 15 | 25947642 | C | T | 0.0462859 | 0.00934944 | 7.40E-07 | 24.51 |
| rs35683760 | 16 | 82821914 | G | A | -0.0310253 | 0.00644836 | 1.50E-06 | 23.15 |
| rs8067154 | 17 | 77191158 | A | G | -0.0300856 | 0.00656562 | 4.60E-06 | 21.00 |
| rs17712285 | 18 | 61755457 | G | A | -0.0709393 | 0.0148038 | 1.70E-06 | 22.96 |
| rs1974821 | 19 | 51917735 | A | G | 0.0356787 | 0.00754587 | 2.30E-06 | 22.36 |
| rs8109178 | 19 | 12265133 | T | A | 0.0389694 | 0.00834268 | 3.00E-06 | 21.82 |
| rs11088797 | 21 | 21726149 | A | G | 0.03961 | 0.00849043 | 3.10E-06 | 21.76 |
| **Carotene** |  |  |  |  |  |  |  |  |
| rs1936052 | 1 | 112869409 | T | C | -0.0361185 | 0.00766833 | 2.50E-06 | 22.18 |
| rs6660246 | 1 | 34362545 | C | A | -0.0266889 | 0.00553072 | 1.40E-06 | 23.29 |
| rs12126792 | 1 | 239923493 | G | A | -0.134712 | 0.0280049 | 1.50E-06 | 23.14 |
| rs77547747 | 4 | 75682041 | C | T | -0.055803 | 0.0118339 | 2.40E-06 | 22.24 |
| rs6596473 | 5 | 138710576 | C | G | 0.0276423 | 0.00597629 | 3.70E-06 | 21.39 |
| rs62417408 | 6 | 56842667 | G | A | -0.0691153 | 0.0146553 | 2.40E-06 | 22.24 |
| rs16898247 | 8 | 124357253 | A | G | -0.107091 | 0.0200309 | 9.00E-08 | 28.58 |
| rs13295574 | 9 | 139014806 | A | G | -0.0276722 | 0.00598182 | 3.70E-06 | 21.40 |
| rs3829931 | 10 | 8125582 | A | T | 0.0830829 | 0.0177899 | 3.00E-06 | 21.81 |
| rs17800766 | 10 | 67099770 | C | T | -0.121685 | 0.0254964 | 1.80E-06 | 22.78 |
| rs2998143 | 10 | 135051562 | G | A | -0.0278722 | 0.00584016 | 1.80E-06 | 22.78 |
| rs4771831 | 13 | 92025752 | A | G | -0.0265212 | 0.00576207 | 4.20E-06 | 21.18 |
| rs366337 | 19 | 54783923 | G | A | 0.0543804 | 0.0112221 | 1.30E-06 | 23.48 |
| rs117731008 | 22 | 43746623 | A | G | 0.0977133 | 0.0212277 | 4.20E-06 | 21.19 |
| rs5760695 | 22 | 25237108 | C | T | 0.0468481 | 0.0100556 | 3.20E-06 | 21.70 |
| **Folate** |  |  |  |  |  |  |  |  |
| rs78074774 | 2 | 34515489 | T | C | 0.0601471 | 0.0131667 | 4.90E-06 | 20.87 |
| rs139588363 | 2 | 140739695 | C | T | 0.05368 | 0.0116503 | 4.10E-06 | 21.23 |
| rs3772928 | 3 | 115406478 | C | T | -0.0272574 | 0.00552739 | 8.20E-07 | 24.31 |
| rs76630415 | 7 | 14144445 | G | T | -0.0373906 | 0.00670304 | 2.40E-08 | 31.11 |
| rs2449166 | 8 | 3463535 | T | C | 0.0252219 | 0.00546681 | 4.00E-06 | 21.29 |
| rs7074988 | 10 | 87848038 | G | A | -0.051278 | 0.0111147 | 4.00E-06 | 21.28 |
| rs1502443 | 16 | 77060066 | G | C | 0.0258943 | 0.00563529 | 4.30E-06 | 21.11 |
| rs16956822 | 17 | 7499349 | A | G | -0.0792943 | 0.017182 | 3.90E-06 | 21.30 |
| rs8085166 | 18 | 3016615 | G | A | 0.0278138 | 0.00581169 | 1.70E-06 | 22.90 |
| rs148031795 | 18 | 482310 | T | C | 0.104439 | 0.0223794 | 3.10E-06 | 21.78 |
| rs79975477 | 20 | 13683165 | T | C | 0.0731991 | 0.0156345 | 2.80E-06 | 21.92 |
| rs76802001 | 22 | 31013399 | A | G | -0.0677158 | 0.0147765 | 4.60E-06 | 21.00 |
| rs79748722 | 22 | 46147495 | T | C | -0.0756746 | 0.0164864 | 4.40E-06 | 21.07 |
| **Iron** |  |  |  |  |  |  |  |  |
| rs17257441 | 1 | 117854279 | T | C | -0.037713 | 0.0082347 | 4.70E-06 | 20.97 |
| rs155599 | 2 | 158307375 | C | T | 0.0302901 | 0.00594077 | 3.40E-07 | 26.00 |
| rs2647238 | 4 | 106218428 | C | T | -0.0254293 | 0.00548898 | 3.60E-06 | 21.46 |
| rs148244439 | 5 | 107434101 | T | C | 0.0591791 | 0.0122191 | 1.30E-06 | 23.46 |
| rs799443 | 7 | 44769013 | A | T | -0.0300914 | 0.00573687 | 1.60E-07 | 27.51 |
| rs56256289 | 7 | 1892529 | T | C | 0.0325776 | 0.00689983 | 2.30E-06 | 22.29 |
| rs6463742 | 7 | 1424928 | C | T | 0.0261434 | 0.00555803 | 2.60E-06 | 22.12 |
| rs9297943 | 8 | 87664244 | G | T | 0.0265312 | 0.00562917 | 2.40E-06 | 22.21 |
| rs1370102 | 10 | 128317498 | A | C | -0.0252135 | 0.00545817 | 3.80E-06 | 21.34 |
| rs118189684 | 11 | 90693179 | C | T | 0.0593252 | 0.0120713 | 8.90E-07 | 24.15 |
| rs114738685 | 11 | 107791031 | T | C | 0.0553606 | 0.0117311 | 2.40E-06 | 22.27 |
| rs116863411 | 20 | 46633015 | T | A | -0.0946561 | 0.0204154 | 3.50E-06 | 21.50 |
| **Magnesium** |  |  |  |  |  |  |  |  |
| rs2745938 | 1 | 208139949 | T | G | 0.0269243 | 0.00561835 | 1.60E-06 | 22.96 |
| rs116740989 | 2 | 104993244 | A | C | 0.117547 | 0.0250756 | 2.80E-06 | 21.97 |
| rs114575778 | 4 | 79596378 | A | G | -0.145164 | 0.0274331 | 1.20E-07 | 28.00 |
| rs116028267 | 5 | 179052804 | G | C | -0.0666131 | 0.014422 | 3.90E-06 | 21.33 |
| rs4535437 | 5 | 79242663 | G | A | 0.0302082 | 0.00623112 | 1.20E-06 | 23.50 |
| rs114989460 | 6 | 46322293 | C | T | 0.0957603 | 0.0208955 | 4.60E-06 | 21.00 |
| rs144862520 | 7 | 153872931 | T | C | -0.0703248 | 0.0153669 | 4.70E-06 | 20.94 |
| rs77126457 | 8 | 136152474 | A | G | 0.114984 | 0.0227843 | 4.50E-07 | 25.47 |
| rs76330086 | 9 | 110307810 | T | C | -0.101588 | 0.0221236 | 4.40E-06 | 21.08 |
| rs7022555 | 9 | 137753121 | T | C | -0.120695 | 0.025269 | 1.80E-06 | 22.81 |
| rs1247081 | 10 | 30048948 | T | G | 0.0256696 | 0.00536614 | 1.70E-06 | 22.88 |
| rs116979507 | 11 | 90779474 | T | C | 0.063628 | 0.0138895 | 4.60E-06 | 20.99 |
| rs573905 | 11 | 118572267 | G | A | 0.0275402 | 0.00538992 | 3.20E-07 | 26.11 |
| rs147150587 | 12 | 28448965 | A | G | 0.128307 | 0.0276315 | 3.40E-06 | 21.56 |
| rs7339029 | 13 | 100899519 | T | G | 0.0362754 | 0.00792269 | 4.70E-06 | 20.96 |
| rs1559583 | 18 | 70714102 | C | T | -0.0303381 | 0.00654176 | 3.50E-06 | 21.51 |
| rs111419911 | 20 | 38900761 | G | A | -0.0292815 | 0.00587917 | 6.30E-07 | 24.81 |
| **Potassium** |  |  |  |  |  |  |  |  |
| rs2745938 | 1 | 208139949 | T | G | 0.0261087 | 0.00566968 | 4.10E-06 | 21.21 |
| rs3772928 | 3 | 115406478 | C | T | -0.0265481 | 0.00551354 | 1.50E-06 | 23.18 |
| rs114300683 | 5 | 154885392 | A | G | -0.114807 | 0.0248968 | 4.00E-06 | 21.26 |
| rs148244439 | 5 | 107434101 | T | C | 0.0566213 | 0.0122646 | 3.90E-06 | 21.31 |
| rs145857065 | 5 | 34461430 | C | T | -0.0828746 | 0.0172848 | 1.60E-06 | 22.99 |
| rs77126457 | 8 | 136152474 | A | G | 0.105123 | 0.0229918 | 4.80E-06 | 20.90 |
| rs35579431 | 8 | 9139385 | T | C | 0.0291435 | 0.00612595 | 2.00E-06 | 22.63 |
| rs7040926 | 9 | 20241351 | C | T | -0.0510548 | 0.0111197 | 4.40E-06 | 21.08 |
| rs10764330 | 10 | 22286351 | G | A | 0.0278001 | 0.00591821 | 2.60E-06 | 22.06 |
| rs12412051 | 10 | 2601269 | C | G | 0.072528 | 0.0149208 | 1.20E-06 | 23.63 |
| rs1360913 | 10 | 61280467 | T | A | 0.0277716 | 0.00550061 | 4.40E-07 | 25.49 |
| rs361294 | 11 | 103993635 | C | A | -0.0282084 | 0.00592974 | 2.00E-06 | 22.63 |
| rs7479680 | 11 | 14154711 | C | A | -0.0380825 | 0.00775317 | 9.00E-07 | 24.13 |
| rs12296227 | 12 | 101439551 | T | G | 0.0284413 | 0.00615091 | 3.80E-06 | 21.38 |
| rs77824658 | 14 | 73222641 | G | A | 0.0438189 | 0.00954414 | 4.40E-06 | 21.08 |
| **Vitamin A** |  |  |  |  |  |  |  |  |
| rs72774943 | 2 | 2715467 | T | C | -0.002746 | 0.000600626 | 4.80E-06 | 20.90 |
| rs4131899 | 3 | 80320484 | T | C | -0.00137242 | 0.000286396 | 1.70E-06 | 22.96 |
| rs72833036 | 6 | 24351057 | G | A | 0.00330275 | 0.000596894 | 3.10E-08 | 30.62 |
| rs10248388 | 7 | 94018115 | C | A | 0.00312721 | 0.000672797 | 3.40E-06 | 21.60 |
| rs4379489 | 8 | 1865205 | G | A | 0.00160931 | 0.000350157 | 4.30E-06 | 21.12 |
| rs1953042 | 9 | 90007027 | C | T | 0.0018439 | 0.0003923 | 2.60E-06 | 22.09 |
| rs3978773 | 10 | 102049300 | A | T | -0.0014102 | 0.000287566 | 9.40E-07 | 24.05 |
| rs74161932 | 10 | 134745108 | C | T | 0.00225535 | 0.000473569 | 1.90E-06 | 22.68 |
| rs1478684 | 11 | 27337345 | G | T | 0.00165031 | 0.000342305 | 1.40E-06 | 23.24 |
| rs7330997 | 13 | 70649177 | C | T | -0.00202514 | 0.00042208 | 1.60E-06 | 23.02 |
| rs2581667 | 18 | 72942835 | G | A | 0.0019536 | 0.000416108 | 2.70E-06 | 22.04 |
| rs9982066 | 21 | 17820437 | A | C | 0.00146405 | 0.000291388 | 5.00E-07 | 25.24 |
| rs6005584 | 22 | 28109329 | C | G | -0.00231054 | 0.000503359 | 4.40E-06 | 21.07 |
| **Vitamin B12** |  |  |  |  |  |  |  |  |
| rs10924919 | 1 | 247272298 | T | C | -0.0286276 | 0.0056423 | 3.90E-07 | 25.74 |
| rs112961770 | 1 | 78554861 | C | G | -0.0888494 | 0.0184324 | 1.40E-06 | 23.23 |
| rs67568068 | 5 | 160155731 | C | T | -0.0317378 | 0.00664671 | 1.80E-06 | 22.80 |
| rs148901823 | 7 | 36745068 | G | A | -0.0486291 | 0.0100516 | 1.30E-06 | 23.41 |
| rs12776611 | 10 | 71424622 | A | G | -0.0878135 | 0.0188958 | 3.40E-06 | 21.60 |
| rs1419875 | 10 | 118044136 | G | T | -0.0315231 | 0.00683151 | 3.90E-06 | 21.29 |
| rs61994378 | 14 | 106827305 | C | T | 0.0934555 | 0.0197741 | 2.30E-06 | 22.34 |
| rs6088761 | 20 | 33777099 | G | A | 0.0292724 | 0.00627081 | 3.00E-06 | 21.79 |
| rs388561 | 22 | 34612149 | C | T | 0.040271 | 0.00854945 | 2.50E-06 | 22.19 |
| **Vitamin B6** |  |  |  |  |  |  |  |  |
| rs188211816 | 1 | 172810049 | A | G | -0.0786243 | 0.0162809 | 1.40E-06 | 23.32 |
| rs155599 | 2 | 158307375 | C | T | 0.0342533 | 0.00598463 | 1.00E-08 | 32.76 |
| rs3772928 | 3 | 115406478 | C | T | -0.0292449 | 0.00553405 | 1.30E-07 | 27.93 |
| rs141933624 | 4 | 91118956 | A | G | -0.0897347 | 0.0192811 | 3.30E-06 | 21.66 |
| rs183178622 | 4 | 103988054 | T | C | -0.0989483 | 0.0206841 | 1.70E-06 | 22.88 |
| rs77806858 | 5 | 153476869 | C | T | -0.0505124 | 0.0106104 | 1.90E-06 | 22.66 |
| rs12198456 | 6 | 120371988 | T | C | 0.0919531 | 0.0197234 | 3.10E-06 | 21.73 |
| rs74640671 | 8 | 21550838 | T | C | -0.127176 | 0.02738 | 3.40E-06 | 21.57 |
| rs12412051 | 10 | 2601269 | C | G | 0.0708635 | 0.0149768 | 2.20E-06 | 22.39 |
| rs361294 | 11 | 103993635 | C | A | -0.0273612 | 0.00595181 | 4.30E-06 | 21.13 |
| rs12226112 | 11 | 14163360 | T | G | 0.0283412 | 0.00572659 | 7.50E-07 | 24.49 |
| rs9560457 | 13 | 90476979 | T | C | 0.0255037 | 0.00553964 | 4.10E-06 | 21.19 |
| rs10138490 | 14 | 80883798 | C | T | -0.0534963 | 0.0114138 | 2.80E-06 | 21.97 |
| rs34938615 | 14 | 22113999 | G | A | -0.122024 | 0.0264416 | 3.90E-06 | 21.30 |
| rs7205927 | 16 | 48911591 | C | A | -0.0257861 | 0.00553457 | 3.20E-06 | 21.71 |
| rs3745438 | 19 | 54972918 | C | T | -0.071266 | 0.0155965 | 4.90E-06 | 20.88 |
| rs67450584 | 22 | 44202370 | T | C | 0.036705 | 0.00745732 | 8.60E-07 | 24.23 |
| rs7292147 | 22 | 17837908 | C | G | -0.0258379 | 0.00550612 | 2.70E-06 | 22.02 |
| **Vitamin C** |  |  |  |  |  |  |  |  |
| rs7626478 | 3 | 165589571 | A | G | 0.0279796 | 0.00610134 | 4.50E-06 | 21.03 |
| rs114598078 | 3 | 81252851 | T | C | 0.0655782 | 0.0137636 | 1.90E-06 | 22.70 |
| rs4481190 | 3 | 155038283 | C | A | -0.0306375 | 0.00574377 | 9.60E-08 | 28.45 |
| rs61868302 | 10 | 135260228 | T | C | -0.0571013 | 0.0118391 | 1.40E-06 | 23.26 |
| rs17482258 | 12 | 26949117 | T | C | 0.042829 | 0.00926045 | 3.70E-06 | 21.39 |
| rs2018201 | 12 | 52340724 | G | T | -0.0808079 | 0.0171646 | 2.50E-06 | 22.16 |
| rs9540734 | 13 | 66965411 | A | G | -0.0259285 | 0.00548469 | 2.30E-06 | 22.35 |
| rs4238567 | 15 | 33927389 | C | T | 0.0253068 | 0.00550812 | 4.30E-06 | 21.11 |
| rs11650824 | 17 | 68115897 | A | T | 0.0794787 | 0.0158822 | 5.60E-07 | 25.04 |
| rs1883993 | 22 | 25211229 | A | G | 0.044959 | 0.00935324 | 1.50E-06 | 23.10 |
| **Vitamin D** |  |  |  |  |  |  |  |  |
| rs4395237 | 2 | 35598885 | G | T | -0.0601061 | 0.0127619 | 2.50E-06 | 22.18 |
| rs2399949 | 3 | 145453826 | C | T | -0.034239 | 0.00705966 | 1.20E-06 | 23.52 |
| rs75713989 | 3 | 186632942 | T | C | 0.039147 | 0.00816677 | 1.60E-06 | 22.98 |
| rs57038272 | 5 | 76259816 | T | C | 0.0333323 | 0.00723695 | 4.10E-06 | 21.21 |
| rs582962 | 6 | 69521978 | A | G | -0.0283174 | 0.00608067 | 3.20E-06 | 21.69 |
| rs9328367 | 6 | 709090 | T | A | 0.0261798 | 0.00561666 | 3.10E-06 | 21.73 |
| rs117693112 | 7 | 108727403 | A | G | 0.0682431 | 0.0144786 | 2.40E-06 | 22.22 |
| rs679830 | 7 | 54674873 | C | T | -0.0601819 | 0.012755 | 2.40E-06 | 22.26 |
| rs80261862 | 7 | 36760624 | T | C | -0.0448741 | 0.00926708 | 1.30E-06 | 23.45 |
| rs17301981 | 9 | 84986248 | C | T | -0.0437855 | 0.00958474 | 4.90E-06 | 20.87 |
| rs74593039 | 10 | 44421069 | C | G | 0.0350049 | 0.00753919 | 3.40E-06 | 21.56 |
| rs61942184 | 12 | 103586618 | C | G | 0.0822174 | 0.0177573 | 3.70E-06 | 21.44 |
| rs35775421 | 14 | 103462580 | A | G | -0.0559707 | 0.0122186 | 4.60E-06 | 20.98 |
| rs10469075 | 18 | 75110848 | T | C | -0.0324603 | 0.00701256 | 3.70E-06 | 21.43 |
| **Vitamin E** |  |  |  |  |  |  |  |  |
| rs536912 | 1 | 109514347 | A | C | 0.0304596 | 0.00620091 | 9.00E-07 | 24.13 |
| rs6033 | 1 | 169521853 | G | A | -0.0516563 | 0.0105563 | 9.90E-07 | 23.94 |
| rs2723979 | 7 | 37364666 | G | T | -0.0266142 | 0.00552745 | 1.50E-06 | 23.18 |
| rs979218 | 7 | 9684248 | C | A | -0.0430325 | 0.00922259 | 3.10E-06 | 21.77 |
| rs79966958 | 9 | 37024435 | T | C | -0.116527 | 0.024505 | 2.00E-06 | 22.61 |
| rs12421920 | 11 | 13249759 | G | A | -0.0434479 | 0.00938496 | 3.70E-06 | 21.43 |
| rs111306778 | 13 | 97282672 | A | G | -0.0479658 | 0.00957227 | 5.40E-07 | 25.11 |
| rs4903544 | 14 | 77596398 | T | C | -0.0295098 | 0.0060211 | 9.50E-07 | 24.02 |
| rs12899673 | 15 | 92561644 | A | G | 0.0268951 | 0.00581803 | 3.80E-06 | 21.37 |
| rs35218694 | 17 | 14785162 | G | A | -0.0741637 | 0.0153104 | 1.30E-06 | 23.46 |
| rs71385328 | 17 | 51353081 | G | A | 0.130015 | 0.0262064 | 7.00E-07 | 24.61 |
| rs12165526 | 22 | 44361713 | A | T | 0.0479017 | 0.00917775 | 1.80E-07 | 27.24 |
| **Copper** |  |  |  |  |  |  |  |  |
| rs2769264 | 1 | 151344741 | G | T | 0.313 | 0.034 | 2.63E-20 | 84.68 |
| rs1175550 | 1 | 3691528 | G | A | 0.198 | 0.032 | 5.03E-10 | 38.26 |
| rs10014072 | 4 | 113948790 | G | A | -0.164 | 0.034 | 1.13E-06 | 23.25 |
| rs12153606 | 5 | 84583769 | T | G | -0.159 | 0.034 | 2.50E-06 | 21.85 |
| rs3857536 | 6 | 66929048 | T | C | -0.129 | 0.028 | 4.08E-06 | 21.21 |
| rs12582659 | 12 | 76064528 | C | T | 1.262 | 0.27 | 2.86E-06 | 21.83 |
| **Selenium** |  |  |  |  |  |  |  |  |
| rs4950779 | 1 | 202542202 | C | T | 0.673 | 0.132 | 3.16E-07 | 25.97 |
| rs10023369 | 4 | 63796543 | A | G | -0.144 | 0.029 | 4.42E-07 | 24.64 |
| rs7700970 | 5 | 78411324 | T | C | 0.265 | 0.037 | 7.17E-13 | 51.26 |
| rs11779526 | 8 | 26910716 | T | A | 0.153 | 0.032 | 1.68E-06 | 22.84 |
| rs7163368 | 15 | 63571121 | C | T | 0.158 | 0.034 | 4.00E-06 | 21.58 |
| rs3785832 | 17 | 59538794 | C | T | -0.146 | 0.031 | 1.82E-06 | 22.16 |
| **Zinc** |  |  |  |  |  |  |  |  |
| rs10931753 | 2 | 154568757 | C | G | -0.129 | 0.028 | 4.94E-06 | 21.21 |
| rs4333127 | 4 | 5930033 | A | G | 0.218 | 0.047 | 3.00E-06 | 21.50 |
| rs11763353 | 7 | 15630871 | G | A | -0.192 | 0.039 | 6.90E-07 | 24.22 |
| rs1532423 | 8 | 86268313 | G | A | -0.178 | 0.026 | 6.40E-12 | 46.83 |
| rs11232535 | 11 | 80928809 | C | T | 0.325 | 0.065 | 6.73E-07 | 24.98 |
| rs7148590 | 14 | 65473196 | A | G | -0.14 | 0.026 | 1.37E-07 | 28.97 |
| rs10484100 | 14 | 86817096 | G | A | -0.209 | 0.045 | 3.30E-06 | 21.55 |
| rs2120019 | 15 | 75334184 | C | T | -0.287 | 0.033 | 1.55E-18 | 75.58 |

**Note: SNPS: single nucleotide polymorphism; CHR: chromosome; EA: effect allele; OA (other allele): non-effect allele; BETA: allele effect value; SE: standard error of BETA**

**Supplement Table 2 MR Results**

| **Micronutrients** | **MR Results** | | | | |
| --- | --- | --- | --- | --- | --- |
| **Methods** | **SNPs** | **Beta** | **SE** | **P-value** |
| **Malignant neoplasm** |  |  |  |  |  |
| **Calcium** | IVW | 19 | 0.030 | 0.053 | 0.584 |
|  | MR Egger | 19 | -0.029 | 0.205 | 0.890 |
|  | Weighted median | 19 | 0.003 | 0.072 | 0.967 |
|  | Simple mode | 19 | -0.022 | 0.145 | 0.881 |
|  | Weighted mode | 19 | -0.001 | 0.128 | 0.991 |
| **Carotene** | IVW | 15 | -0.067 | 0.080 | 0.403 |
|  | MR Egger | 15 | -0.165 | 0.177 | 0.366 |
|  | Weighted median | 15 | -0.106 | 0.081 | 0.194 |
|  | Simple mode | 15 | -0.265 | 0.144 | 0.087 |
|  | Weighted mode | 15 | -0.182 | 0.127 | 0.174 |
| **Folate** | IVW | 12 | 0.127 | 0.060 | 0.036 |
|  | MR Egger | 12 | 0.267 | 0.132 | 0.071 |
|  | Weighted median | 12 | 0.090 | 0.083 | 0.279 |
|  | Simple mode | 12 | 0.043 | 0.131 | 0.747 |
|  | Weighted mode | 12 | 0.062 | 0.129 | 0.640 |
| **Iron** | IVW | 11 | 0.018 | 0.071 | 0.798 |
|  | MR Egger | 11 | -0.260 | 0.200 | 0.226 |
|  | Weighted median | 11 | 0.039 | 0.098 | 0.687 |
|  | Simple mode | 11 | 0.136 | 0.175 | 0.455 |
|  | Weighted mode | 11 | 0.127 | 0.187 | 0.511 |
| **Magnesium** | IVW | 17 | 0.050 | 0.064 | 0.433 |
|  | MR Egger | 17 | 0.008 | 0.128 | 0.950 |
|  | Weighted median | 17 | 0.022 | 0.081 | 0.785 |
|  | Simple mode | 17 | 0.098 | 0.154 | 0.536 |
|  | Weighted mode | 17 | 0.083 | 0.150 | 0.588 |
| **Potassium** | IVW | 14 | -0.060 | 0.076 | 0.428 |
|  | MR Egger | 14 | -0.129 | 0.221 | 0.572 |
|  | Weighted median | 14 | -0.017 | 0.093 | 0.856 |
|  | Simple mode | 14 | -0.009 | 0.143 | 0.951 |
|  | Weighted mode | 14 | 0.005 | 0.124 | 0.968 |
| **Vitamin A** | IVW | 11 | -0.551 | 1.464 | 0.707 |
|  | MR Egger | 11 | -2.810 | 5.629 | 0.630 |
|  | Weighted median | 11 | -1.063 | 1.806 | 0.556 |
|  | Simple mode | 11 | -1.993 | 2.844 | 0.499 |
|  | Weighted mode | 11 | -1.228 | 2.863 | 0.677 |
| **Vitamin B12** | IVW | 8 | -0.127 | 0.114 | 0.265 |
|  | MR Egger | 8 | -0.183 | 0.292 | 0.555 |
|  | Weighted median | 8 | 0.022 | 0.107 | 0.838 |
|  | Simple mode | 8 | 0.030 | 0.178 | 0.869 |
|  | Weighted mode | 8 | 0.030 | 0.128 | 0.819 |
| **Vitamin B6** | IVW | 17 | -0.075 | 0.060 | 0.212 |
|  | MR Egger | 17 | 0.051 | 0.139 | 0.717 |
|  | Weighted median | 17 | -0.090 | 0.077 | 0.243 |
|  | Simple mode | 17 | -0.002 | 0.136 | 0.989 |
|  | Weighted mode | 17 | -0.079 | 0.137 | 0.572 |
| **Vitamin C** | IVW | 10 | 0.018 | 0.072 | 0.801 |
|  | MR Egger | 10 | 0.044 | 0.200 | 0.830 |
|  | Weighted median | 10 | -0.017 | 0.096 | 0.859 |
|  | Simple mode | 10 | -0.141 | 0.178 | 0.448 |
|  | Weighted mode | 10 | -0.146 | 0.195 | 0.471 |
| **Vitamin D** | IVW | 13 | -0.012 | 0.065 | 0.842 |
|  | MR Egger | 13 | -0.168 | 0.240 | 0.498 |
|  | Weighted median | 13 | 0.032 | 0.083 | 0.700 |
|  | Simple mode | 13 | 0.140 | 0.159 | 0.395 |
|  | Weighted mode | 13 | 0.120 | 0.149 | 0.435 |
| **Vitamin E** | IVW | 12 | 0.022 | 0.054 | 0.682 |
|  | MR Egger | 12 | 0.020 | 0.110 | 0.860 |
|  | Weighted median | 12 | 0.043 | 0.074 | 0.562 |
|  | Simple mode | 12 | 0.095 | 0.131 | 0.487 |
|  | Weighted mode | 12 | -0.006 | 0.097 | 0.951 |
| **Copper** | IVW | 6 | -0.001 | 0.011 | 0.909 |
|  | MR Egger | 6 | 0.001 | 0.018 | 0.954 |
|  | Weighted median | 6 | -0.003 | 0.010 | 0.754 |
|  | Simple mode | 6 | -0.001 | 0.019 | 0.979 |
|  | Weighted mode | 6 | -0.004 | 0.010 | 0.705 |
| **Selenium** | IVW | 6 | -0.041 | 0.013 | 0.002 |
|  | MR Egger | 6 | -0.044 | 0.028 | 0.188 |
|  | Weighted median | 6 | -0.042 | 0.017 | 0.012 |
|  | Simple mode | 6 | -0.05 | 0.022 | 0.096 |
|  | Weighted mode | 6 | -0.045 | 0.020 | 0.079 |
| **Zinc** | IVW | 8 | 0.021 | 0.016 | 0.187 |
|  | MR Egger | 8 | -0.020 | 0.057 | 0.734 |
|  | Weighted median | 8 | 0.0174 | 0.018 | 0.346 |
|  | Simple mode | 8 | -0.001 | 0.026 | 0.984 |
|  | Weighted mode | 8 | 0.011 | 0.022 | 0.628 |
