# Supplementary material for: Causal associations between micronutrients and malignant neoplasms: a two-sample mendelian Randomization study
Source: Research Square preprint supplement (doi:10.21203/rs.3.rs-6966622/v1), 2025-08-20
Supplement: Supplementary file 4 [file eabffc31e57479e7299af852.docx]

**Supplement Table 5** **multivariate Mendelian randomization analysis**

| Micronutrients | **multivariate MR analysis** | | |
| --- | --- | --- | --- |
| Beta | SE | P-value |
| **Selenium** | -0.033817125 | 0.01154626 | 0.003402316 |
| **Folate** | 0.099302624 | 0.070182141 | 0.157089824 |
