# Supplementary figures and images for: Causal associations between micronutrients and malignant neoplasms: a two-sample mendelian Randomization study
Source: Research Square preprint supplement (doi:10.21203/rs.3.rs-6966622/v1), 2025-08-20

MR Results


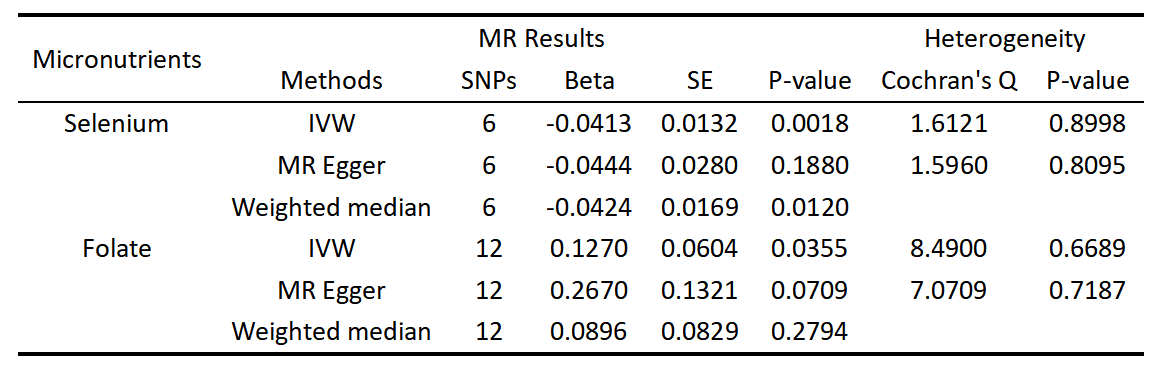


Forest map


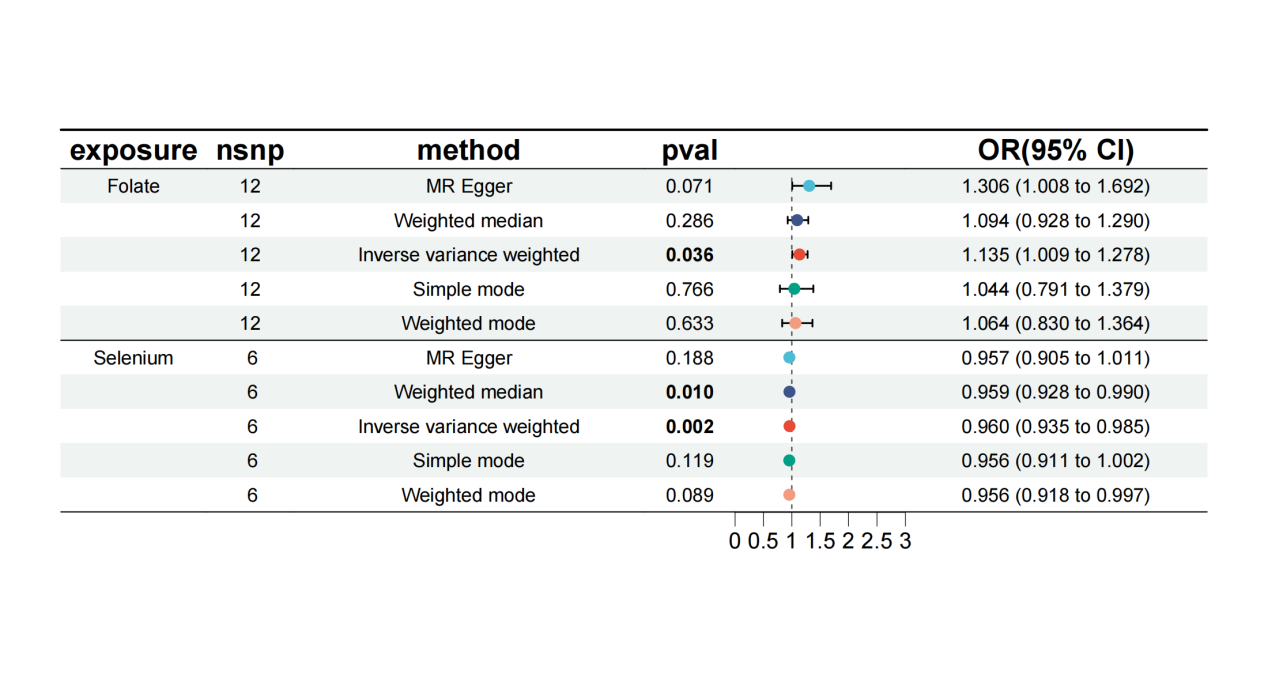

Supplement: Supplementary file 1 [file 14e2e174f6746d83cc1b71b2.docx]
